# Supplementary material
Source: PubMed Central journal article supplement (PMC8210631)
Supplement: NIHMS1682220-supplement-Supplementary_tables.pdf [file NIHMS1682220-supplement-Supplementary_tables.pdf]

**Supplementary Table 1. Multivariable-adjusted associations between adiposity measures (continuous) and mammographic breast density**

| Adiposity measures <sup>b</sup>                                              | N   | Volumetric percent density (%) |                  |
|------------------------------------------------------------------------------|-----|--------------------------------|------------------|
|                                                                              |     | %Diff <sup>a</sup>             | 95% CI           |
| Body fat (%) <sup>c</sup>                                                    | 362 | <b>-2.9</b>                    | <b>-3.5,-2.4</b> |
| Hip circumference (cm) <sup>c</sup>                                          | 365 | <b>-1.1</b>                    | <b>-1.4,-0.8</b> |
| Waist circumference (cm) <sup>c</sup>                                        | 366 | <b>-1.3</b>                    | <b>-1.6,-1.1</b> |
| BMI at age 18 years (kg/m <sup>2</sup> )                                     | 367 | <b>-1.6</b>                    | <b>-2.8,-0.4</b> |
| BMI at age 30 years (kg/m <sup>2</sup> )                                     | 367 | <b>-2.2</b>                    | <b>-3.0,-1.3</b> |
| BMI at mammogram (kg/m <sup>2</sup> )                                        | 367 | <b>-3.5</b>                    | <b>-4.1,-2.9</b> |
| BMI change from age 10 to age at mammogram (kg/m <sup>2</sup> ) <sup>d</sup> | 357 | <b>-3.5</b>                    | <b>-4.2,-2.8</b> |
| BMI change from age 18 to age at mammogram (kg/m <sup>2</sup> ) <sup>d</sup> | 367 | <b>-3.6</b>                    | <b>-4.3,-2.8</b> |
| BMI change from age 30 to age at mammogram (kg/m <sup>2</sup> ) <sup>d</sup> | 367 | <b>-3.9</b>                    | <b>-4.8,-2.9</b> |
| Weight at age 18 years (kg)                                                  | 367 | <b>-0.7</b>                    | <b>-1.2,-0.3</b> |
| Weight at age 30 years (kg)                                                  | 367 | <b>-1.0</b>                    | <b>-1.3,-0.6</b> |
| Weight change from age 18 to age at mammogram (kg) <sup>d</sup>              | 367 | <b>-1.5</b>                    | <b>-1.8,-1.2</b> |
| Weight change from age 30 to age at mammogram (kg) <sup>d</sup>              | 367 | <b>-1.6</b>                    | <b>-2.0,-1.3</b> |

<sup>a</sup> Percentage difference (%Diff) represents one unit change in adiposity measures associated with percent change in volumetric percent density, dense volume, and non-dense volume.

<sup>b</sup> All models were adjusted for age at mammogram (continuous, years), family history of breast cancer (yes/no), age at menarche (continuous, years), parity and age at first birth (categorical), race (Non-Hispanic white/African American/Others), current alcohol consumption (yes/no) and menopausal hormone therapy use (yes/no).

<sup>c</sup> Adiposity measures at time of mammogram.

<sup>d</sup> For each BMI change and weight change variables were additionally adjusted for BMI at age 10 (continuous, kg/m<sup>2</sup>).

**Supplementary Table 2. Multivariable-adjusted associations between changes in body mass index (BMI) over the life course and volumetric percent density, stratified by race**

| BMI measures <sup>b</sup>                                                        | Non-Hispanic White (N=228) |                    |                    | African American (N=130) |                    |                    |
|----------------------------------------------------------------------------------|----------------------------|--------------------|--------------------|--------------------------|--------------------|--------------------|
|                                                                                  | N (%)                      | %Diff <sup>a</sup> | 95% CI             | N (%)                    | %Diff <sup>a</sup> | 95% CI             |
| <b>BMI change from age 10 to age at mammogram (kg/m<sup>2</sup>)<sup>c</sup></b> |                            |                    |                    |                          |                    |                    |
| BMI gain: 0.1-5                                                                  | 13 (5.7%)                  | Ref                |                    | 6 (4.6%)                 | Ref                |                    |
| BMI gain: 5.1 - 10                                                               | 69 (30.3%)                 | <b>-26.2</b>       | <b>-43.8,-3.1</b>  | 26 (20.0%)               | -26.0              | -51.7,13.4         |
| BMI gain: 10.1 - 15                                                              | 64 (28.1%)                 | <b>-50.8</b>       | <b>-62.6,-35.4</b> | 36 (27.7%)               | <b>-35.9</b>       | <b>-58.1,-1.8</b>  |
| BMI gain: > 15                                                                   | 74 (32.5%)                 | <b>-57.0</b>       | <b>-67.1,-43.9</b> | 60 (46.2%)               | <b>-54.4</b>       | <b>-70.1,-30.6</b> |
| <i>P</i> <sub>interaction</sub> <sup>d</sup> = 0.31                              |                            |                    |                    |                          |                    |                    |
| <b>BMI change from age 18 to age at mammogram (kg/m<sup>2</sup>)</b>             |                            |                    |                    |                          |                    |                    |
| BMI loss                                                                         | 13 (5.7%)                  | -3.02              | -26.5,28.0         | 3 (2.3%)                 | 27.7               | -34.1,147.4        |
| BMI gain: 0.1-5                                                                  | 63 (27.6%)                 | Ref                |                    | 15 (11.5%)               | Ref                |                    |
| BMI gain: 5.1 - 10                                                               | 63 (27.6%)                 | <b>-29.5</b>       | <b>-40.3,-16.8</b> | 43 (33.1%)               | 2.7                | -34.1,147.4        |
| BMI gain: 10.1 - 15                                                              | 54 (23.7%)                 | <b>-44.1</b>       | <b>-52.7,-34.0</b> | 41 (31.5%)               | -9.0               | -32.0,21.7         |
| BMI gain: > 15                                                                   | 35 (15.4%)                 | <b>-48.6</b>       | <b>-57.7,-37.6</b> | 28 (21.5%)               | <b>-28.1</b>       | <b>-47.0,-2.4</b>  |
| <i>P</i> <sub>interaction</sub> <sup>d</sup> = 0.23                              |                            |                    |                    |                          |                    |                    |
| <b>BMI change from age 30 to age at mammogram (kg/m<sup>2</sup>)</b>             |                            |                    |                    |                          |                    |                    |
| BMI loss                                                                         | 23 (10.1%)                 | 17.4               | -6.1,46.9          | 11 (8.5%)                | 27.5               | -8.7,77.9          |
| BMI gain: 0.1-5                                                                  | 92 (40.4%)                 | Ref                |                    | 33 (25.4%)               | Ref                |                    |
| BMI gain: 5.1 - 10                                                               | 69 (30.3%)                 | <b>-25.1</b>       | <b>-35.5,-12.9</b> | 49 (37.7%)               | -14.2              | -30.5, 6.0         |
| BMI gain: 10.1 - 15                                                              | 32 (14.0%)                 | <b>-36.8</b>       | <b>-47.7,-23.6</b> | 25 (19.2%)               | -18.2              | -36.7, 5.9         |
| BMI gain: > 15                                                                   | 12 (5.3%)                  | <b>-41.1</b>       | <b>-56.6,-20.2</b> | 12 (9.2%)                | -20.7              | -42.4, 9.4         |
| <i>P</i> <sub>interaction</sub> <sup>d</sup> = 0.68                              |                            |                    |                    |                          |                    |                    |

<sup>a</sup> Percentage difference (%Diff) represents one unit change in BMI associated with percent change in volumetric percent density.

<sup>b</sup> All models were adjusted for age at mammogram (continuous, years), family history of breast cancer (yes/no), age at menarche (continuous, years), parity and age at first birth (categorical), current alcohol consumption (yes/no), menopausal hormone therapy use (yes/no), and BMI at age 10 (continuous, kg/m<sup>2</sup>).

<sup>c</sup> There were 356 women who had BMI gain from age 10 to age at mammogram, we did not show data on 1 woman who had BMI loss from age 10 to age at mammogram; 10 women had missing information for BMI from age 10 to age at mammogram.

<sup>d</sup> Interaction between race and BMI change at various time periods in multivariable-adjusted model.

**Supplementary Table 3. Multivariable-adjusted associations between changes in body mass index (BMI) over the life course and volumetric percent density, stratified by menopausal hormone therapy use**

| BMI measures <sup>b</sup>                                                        | No receiving menopausal hormone therapy<br>(N=244) |                    |                    | Receiving menopausal hormone therapy<br>(N=122) |                    |                    |
|----------------------------------------------------------------------------------|----------------------------------------------------|--------------------|--------------------|-------------------------------------------------|--------------------|--------------------|
|                                                                                  | N (%)                                              | %Diff <sup>a</sup> | 95% CI             | N (%)                                           | %Diff <sup>a</sup> | 95% CI             |
| <b>BMI change from age 10 to age at mammogram (kg/m<sup>2</sup>)<sup>c</sup></b> |                                                    |                    |                    |                                                 |                    |                    |
| BMI gain: 0.1-5                                                                  | 8 (3.3%)                                           | Ref                |                    | 11 (9.0%)                                       | Ref                |                    |
| BMI gain: 5.1 - 10                                                               | 68 (27.9%)                                         | -19.9              | -44.1,14.9         | 30 (24.6%)                                      | -24.0              | -43.2, 1.71        |
| BMI gain: 10.1 - 15                                                              | 64 (26.2%)                                         | <b>-40.7</b>       | <b>-58.7,-14.9</b> | 38 (31.2%)                                      | <b>-48.1</b>       | <b>-61.4,-30.3</b> |
| BMI gain: > 15                                                                   | 96 (39.3%)                                         | <b>-54.2</b>       | <b>-68.0,-34.4</b> | 40 (32.8%)                                      | <b>-56.3</b>       | <b>-67.1,-41.9</b> |
| <i>P</i> <sub>interaction</sub> <sup>d</sup> = 0.68                              |                                                    |                    |                    |                                                 |                    |                    |
| <b>BMI change from age 18 to age at mammogram (kg/m<sup>2</sup>)</b>             |                                                    |                    |                    |                                                 |                    |                    |
| BMI loss                                                                         | 7 (2.9%)                                           | 11.8               | -23.5,63.4         | 11 (9.0%)                                       | -4.8               | -31.2,31.8         |
| BMI gain: 0.1-5                                                                  | 55 (22.5%)                                         | Ref                |                    | 25 (20.5%)                                      | Ref                |                    |
| BMI gain: 5.1 - 10                                                               | 67 (27.5%)                                         | -15.1              | -28.5, 0.7         | 41 (33.6%)                                      | <b>-36.9</b>       | <b>-50.0,-20.6</b> |
| BMI gain: 10.1 - 15                                                              | 66 (27.1%)                                         | <b>-34.5</b>       | <b>-44.8,-22.4</b> | 30 (24.6%)                                      | <b>-44.4</b>       | <b>-56.6,-28.7</b> |
| BMI gain: > 15                                                                   | 49 (20.1%)                                         | <b>-43.1</b>       | <b>-52.7,-31.7</b> | 15 (12.3%)                                      | <b>-51.8</b>       | <b>-64.5,-34.7</b> |
| <i>P</i> <sub>interaction</sub> <sup>d</sup> = 0.18                              |                                                    |                    |                    |                                                 |                    |                    |
| <b>BMI change from age 30 to age at mammogram (kg/m<sup>2</sup>)</b>             |                                                    |                    |                    |                                                 |                    |                    |
| BMI loss                                                                         | 25 (10.3%)                                         | 19.2               | -3.9,47.8          | 11 (9.0%)                                       | 23.0               | -11.2,70.4         |
| BMI gain: 0.1-5                                                                  | 76 (31.2%)                                         | Ref                |                    | 52 (42.6%)                                      | Ref                |                    |
| BMI gain: 5.1 - 10                                                               | 84 (34.4%)                                         | <b>-27.5</b>       | <b>-37.4,-15.9</b> | 35 (28.7%)                                      | -12.8              | -29.6, 8.1         |
| BMI gain: 10.1 - 15                                                              | 38 (15.6%)                                         | <b>-34.7</b>       | <b>-45.7,-21.4</b> | 20 (16.4%)                                      | -29.5              | -46.1,-7.9         |
| BMI gain: > 15                                                                   | 21 (8.6%)                                          | <b>-36.7</b>       | <b>-50.1,-19.5</b> | 4 (3.3%)                                        | -35.9              | -60.6, 4.4         |
| <i>P</i> <sub>interaction</sub> <sup>d</sup> = 0.88                              |                                                    |                    |                    |                                                 |                    |                    |

<sup>a</sup> Percentage difference (%Diff) represents one unit change in BMI associated with percent change in volumetric percent density.

<sup>b</sup> All models were adjusted for age at mammogram (continuous, years), family history of breast cancer (yes/no), age at menarche (continuous, years), parity and age at first birth (categorical), race (Non-Hispanic white/African American/Others), current alcohol consumption (yes/no), and BMI at age 10 (continuous, kg/m<sup>2</sup>).

<sup>c</sup> There were 356 women who had BMI gain from age 10 to age at mammogram, we did not show data on 1 woman who had BMI loss from age 10 to age at mammogram; 10 women had missing information for BMI from age 10 to age at mammogram.

<sup>d</sup> Interaction between menopausal hormone therapy and BMI change at various time periods in multivariable-adjusted model.
